# Supplementary material
Source: PubMed Central journal article supplement (PMC5574170)
Supplement: NIHMS889176-supplement-data.pdf [file NIHMS889176-supplement-data.pdf]

**Supplementary Table 1.  $T_m$  value correlations at pH 7.0**

| Parameter                        | 95% confidence interval | P value | P value summary | R      |
|----------------------------------|-------------------------|---------|-----------------|--------|
| Abundance                        | -0.5542 to 0.6420       | 0.8415  | ns              | 0.0685 |
| Number Amino Acids               | -0.5780 to 0.3388       | 0.5466  | ns              | 0.1522 |
| Instability Index                | -0.5879 to 0.3254       | 0.5081  | ns              | 0.1669 |
| Contact Order                    | -0.8636 to 0.2848       | 0.2042  | ns              | 0.4678 |
| Hydropathicity                   | -0.5812 to 0.3344       | 0.534   | ns              | 0.1569 |
| pI                               | -0.2150 to 0.6605       | 0.2605  | ns              | 0.2800 |
| % amino acids positively charged | -0.5794 to 0.3369       | 0.5411  | ns              | 0.1543 |
| % amino acids negatively charged | -0.2305 to 0.6512       | 0.2882  | ns              | 0.2648 |
| % amino acids charged            | -0.3891 to 0.5381       | 0.7074  | ns              | 0.0951 |
| % aromatic amino acids           | -0.4202 to 0.5111       | 0.8191  | ns              | 0.0580 |
| % amino acids hydrophobic        | -0.4424 to 0.4906       | 0.9034  | ns              | 0.0308 |
| Molecular weight                 | -0.5698 to 0.3495       | 0.5788  | ns              | 0.1402 |
| Aliphatic Index                  | -0.4298 to 0.5023       | 0.8551  | ns              | 0.0463 |
| A                                | -0.6210 to 0.2779       | 0.3869  | ns              | 0.2171 |
| C                                | -0.8908 to -0.3914      | 0.0007  | ***             | 0.7257 |
| D                                | -0.6978 to 0.1481       | 0.1642  | ns              | 0.3425 |
| E                                | -0.3105 to 0.5987       | 0.4676  | ns              | 0.1829 |
| F                                | -0.4258 to 0.5061       | 0.8397  | ns              | 0.0513 |
| G                                | -0.1223 to 0.7110       | 0.1358  | ns              | 0.3655 |
| H                                | -0.6873 to 0.1678       | 0.1889  | ns              | 0.3245 |
| I                                | -0.3074 to 0.6008       | 0.4595  | ns              | 0.1862 |
| K                                | -0.2258 to 0.6541       | 0.2795  | ns              | 0.2695 |
| L                                | -0.2443 to 0.6427       | 0.3147  | ns              | 0.2512 |
| M                                | 0.2039 to 0.8393        | 0.0069  | *               | 0.6125 |
| N                                | -0.1668 to 0.6878       | 0.1877  | ns              | 0.3254 |
| P                                | -0.7753 to -0.02136     | 0.0421  | ns              | 0.4834 |
| Q                                | -0.4494 to 0.4840       | 0.9306  | ns              | 0.0221 |
| R                                | -0.5105 to 0.4209       | 0.8215  | ns              | 0.0572 |
| S                                | -0.3516 to 0.5682       | 0.5854  | ns              | 0.1379 |
| T                                | -0.5547 to 0.3687       | 0.6394  | ns              | 0.1185 |
| V                                | -0.7558 to 0.02572      | 0.0632  | ns              | 0.4465 |
| W                                | 0.03831 to 0.7820       | 0.0362  | ns              | 0.4963 |
| Y                                | -0.7473 to 0.04529      | 0.0744  | ns              | 0.4307 |

ns = the correlation is not statistically significant

**Supplementary Table 2. Primers sequences used in the LIC cloning procedure.**

| <b>GTPase</b> | <b>Direction</b> | <b>LIC cloning primer sequence</b>                                            |
|---------------|------------------|-------------------------------------------------------------------------------|
| Gsp1          | Forward          | 5' TACTTCCAATCCAATGCG ATGTCTGCCCCAGCTGCTAACG 3'                               |
|               | Reverse          | 5' TTATCCACTTCCAATGCGCTA TTATAAATCAGCATCATCTTCATC 3'                          |
| Gsp2          | Forward          | 5' TACTTCCAATCCAATGCG ATGTCAGCACCTGCTCAAAAC 3'                                |
|               | Reverse          | 5' TTATCCACTTCCAATGCGCTA TTATAAATCAGCATCGTCTTC 3'                             |
| Rho2          | Forward          | 5' TACTTCCAATCCAATGCG ATGTCTGAAAAGGCCGTTAGAAG 3'                              |
|               | Reverse          | 5' TTATCCACTTCCAATGCGCTA TTATAAAATATGCAACAGTTAG 3'                            |
| Rho3          | Forward          | 5' TACTTCCAATCCAATGCG ATGTCATTTCTATGTGGGTCAGC 3'                              |
|               | Reverse          | 5' TTATCCACTTCCAATGCGCTA TTACATAATGGTACAGCTGGATC 3'                           |
| Rho4          | Forward          | 5' TACTTCCAATCCAATGCG ATGAATACACTATTATTTAAGCG 3'                              |
|               | Reverse          | 5' TTATCCACTTCCAATGCGCTA TTACATTATAATACACTTGTT 3'                             |
| Cdc42         | Forward          | 5' TACTTCCAATCCAATGCG ATGCAAACGCTAAAGTGTGTTG 3'                               |
|               | Reverse          | 5' TTATCCACTTCCAATGCGCTA CTACAAAATTCACATTTTTTAC 3'                            |
| Ras1          | Forward          | 5' TACTTCCAATCCAATGCG ATGCAGGGAAATAAATCAACTATAAG 3'                           |
|               | Reverse          | 5' TTATCCACTTCCAATGCGCTA TCAACAAATTATACAACAACC 3'                             |
| Rho1          | Forward          | 5' TACTTCCAATCCAATGCG ATGTCACAACAAGTTGGTAACAG 3'                              |
|               | Reverse          | 5' TTATCCACTTCCAATGCGCTA CTATAACAAGACACACTTCTTC 3'                            |
| Ras2          | Forward          | 5' TACTTCCAATCCAATGCG ATGCCTTTGAACAAGTCGAACATAAG 3'                           |
|               | Reverse          | 5' TTATCCACTTCCAATGCGCTA TTAACCTATAATACAACAGCCACC 3'                          |
| Sar1*         | Forward          | 5' TACTTCCAATCCAATGCG ATGGCTGGTTGGGATATTTTTGGTTGG 3'                          |
|               | Forward          | 5' TACTTCCAATCCAATGCG ATGGCTGGTTGGGATATTTTTGGTTGG<br>TCAGAGATGTGTTGGCTTCCC 3' |
|               | Reverse          | 5' TTATCCACTTCCAATGCGCTA TTAAATATATTGAGATAACCATTGG 3'                         |
| Rsr1          | Forward          | 5' TACTTCCAATCCAATGCG ATGAGAGACTATAAATTAGTAG 3'                               |
|               | Reverse          | 5' TTATCCACTTCCAATGCGCTA CTATAGAATAGTGAAGTGG 3'                               |
| Vps21         | Forward          | 5' TACTTCCAATCCAATGCG ATGAACACATCAGTCACTTCC 3'                                |
|               | Reverse          | 5' TTATCCACTTCCAATGCGCTA CTAACAACGCAAGCACTGTTTGC 3'                           |
| Arl1          | Forward          | 5' TACTTCCAATCCAATGCG ATGGGTAACATTTTAGTTCAATG 3'                              |
|               | Reverse          | 5' TTATCCACTTCCAATGCGCTA CTATAACTGTTCTCTTTTATAAC 3'                           |
| Arf1          | Forward          | 5' TACTTCCAATCCAATGCG ATGGGTTTGTTCCTCTAAG 3'                                  |
|               | Reverse          | 5' TTATCCACTTCCAATGCGCTA TTAAGTTGAGTTTTTCAAACG 3'                             |
| Arf3          | Forward          | 5' TACTTCCAATCCAATGCG ATGGGCAATTCAATTCGAAGG 3'                                |
|               | Reverse          | 5' TTATCCACTTCCAATGCGCTA TTATTTCTTTGGAACGTTTGTG 3'                            |
| Sec4          | Forward          | 5' TACTTCCAATCCAATGCG ATGTCAGGCTTGAGAACTGTTTC 3'                              |
|               | Reverse          | 5' TTATCCACTTCCAATGCGCTA TCAACAGCAATTTGATTTAGAAC 3'                           |
| Ypt1          | Forward          | 5' TACTTCCAATCCAATGCG ATGAATAGCGAGTACGATTACC 3'                               |
|               | Reverse          | 5' TTATCCACTTCCAATGCGCTA TCAACAGCAGCCCCACCGGTG 3'                             |
| Ypt6          | Forward          | 5' TACTTCCAATCCAATGCG ATGAGCAGATCCGGGAAATCATTG 3'                             |
|               | Reverse          | 5' TTATCCACTTCCAATGCGCTA CTAACACTGACAAGCGCTTGTG 3'                            |

\*Cloning required two steps to remove an intron.

# Supplementary Figure 1.

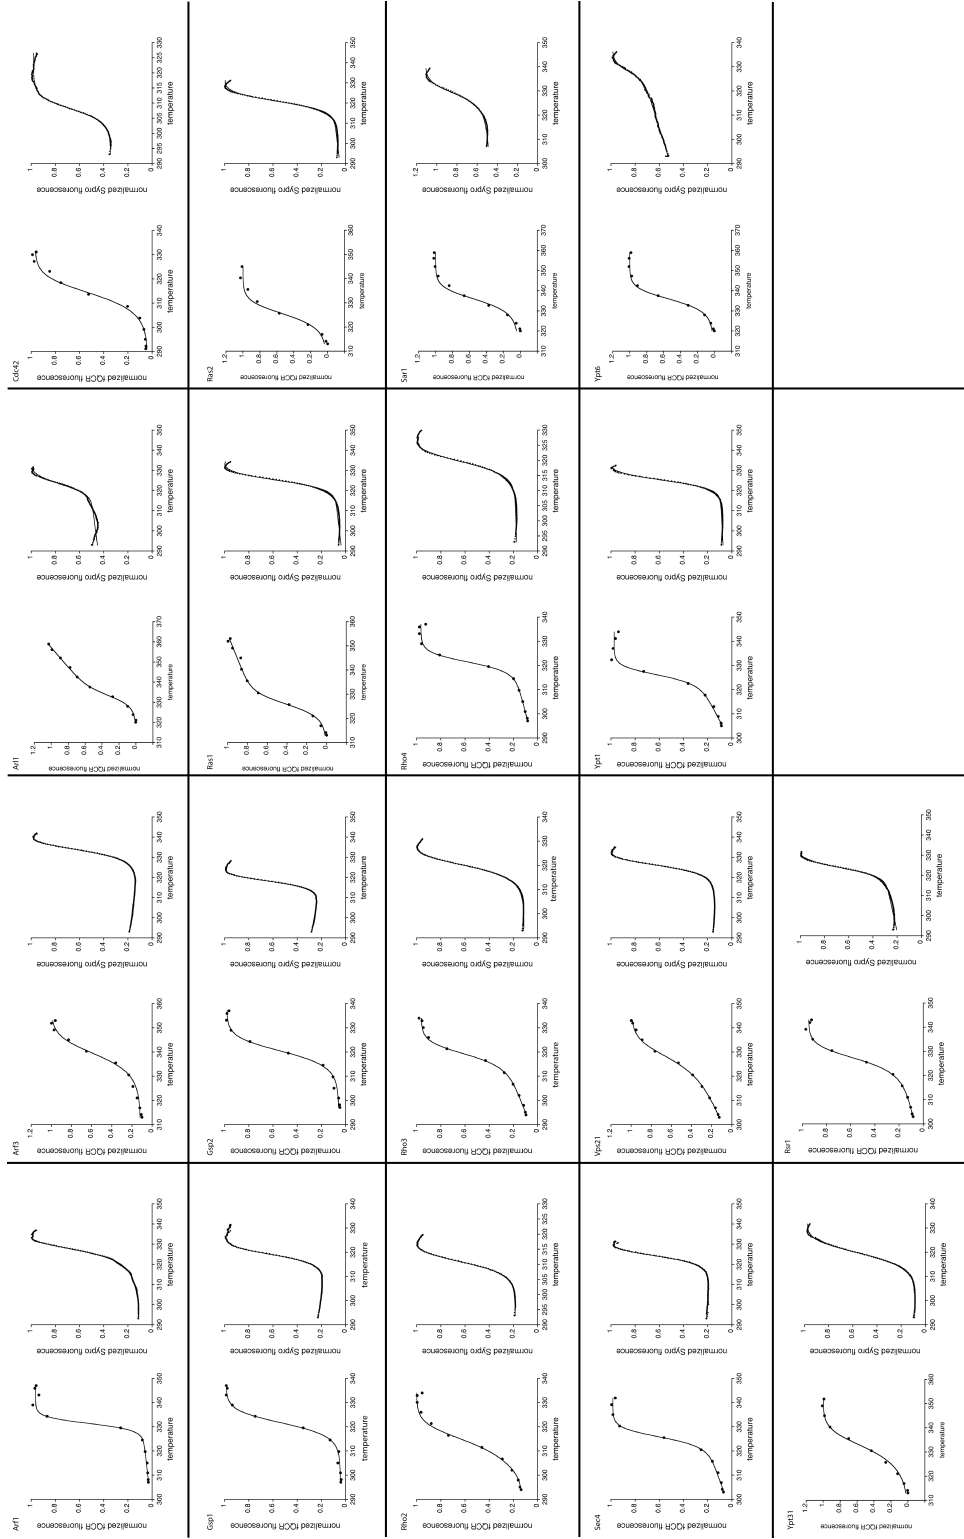

**Supplementary Figure Legend 1.** Thermal unfolding curves for the set of 18 yeast GTPases at pH 7.0. The black line in each plot indicates a non-linear least squares fit of the Gibbs-Helmholtz equation (Eqs. 1 & 2 in the main text). Temperature is displayed in units of Kelvin ( $273 + T_m$  value in degrees Celsius) to accommodate the fitting procedure. Unfolding curves monitored by Sypro fluorescence correspond to the ThermoFluor method.

## Supplementary Figure 2.

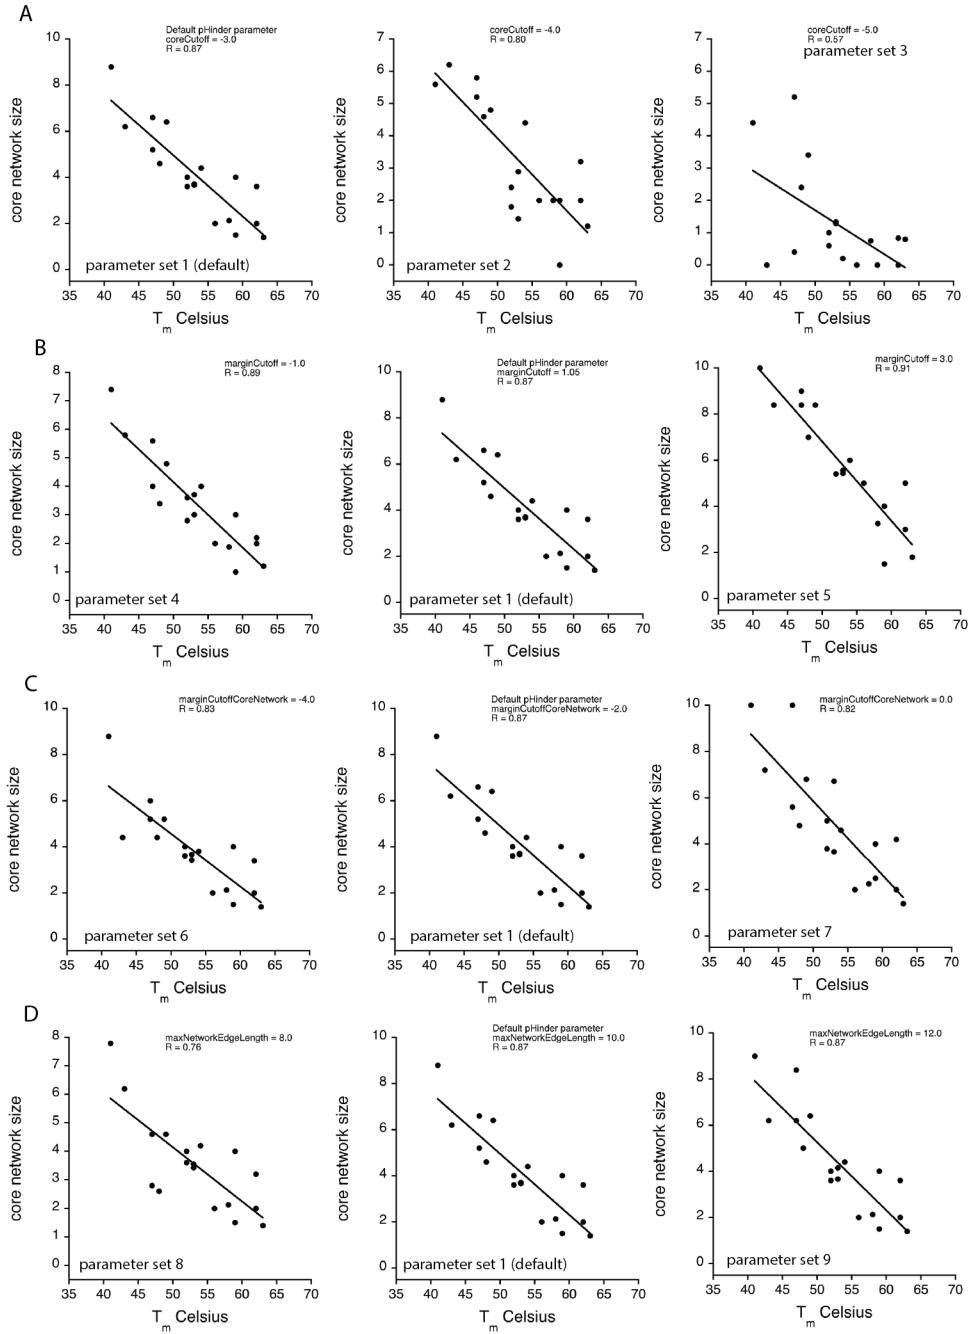

**Supplementary Figure Legend 2.** Sensitivity of the correlation between core network size and Ras paralog  $T_m$  values to the parameters of the pHinder algorithm. **(A)** The distance constraint for classifying core side chains (*coreCutoff*) is varied  $\pm 1.0$  Å from a default value of 3.0 Å. **(B-D)** The distance constraints for classifying margin side chains (*marginCutoff*), classifying deep margin side chains (*marginCutoffCoreNetwork*), and setting the maximum network edge length (*maxNetworkEdgeLength*) are varied  $\pm 2.0$  Å from default values of -1.05 Å, -2.0 Å, and 10.0 Å respectively.

### Supplementary Figure 3.

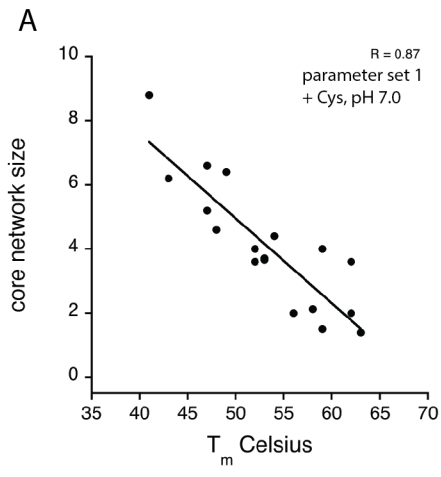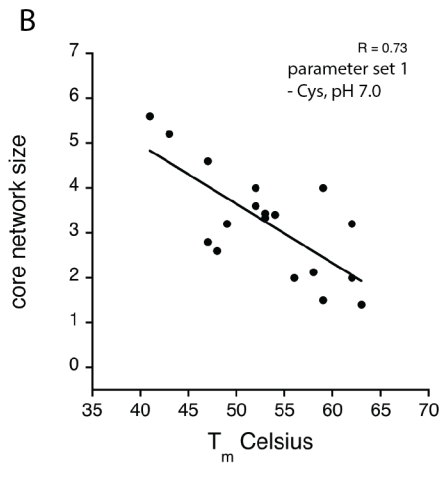

**Supplementary Figure Legend 3.** Sensitivity of the correlation between core network size and Ras paralog thermostability to the inclusion of Cys residues in the pHinder algorithm.
